# Supplementary material
Source: PubMed Central journal article supplement (PMC6446235)
Supplement: NIHMS1004518-supplement-Suppl_Table_1.pdf [file NIHMS1004518-supplement-Suppl_Table_1.pdf]

**S- Table 1. Target mRNAs, primer sequences, amplification conditions, and annealing temperatures**

| Target mRNA | Forward Primer                          | Reverse Primer                            | Amplicon Size (bp) | Annealing Temperature |
|-------------|-----------------------------------------|-------------------------------------------|--------------------|-----------------------|
| GAPDH       | 5'-CCT GTG ACT TCA<br>ACA GCA ACT CC-3' | 5'-CCA CCA CCC<br>TGT TGC TGT AGC<br>C-3' | 106                | 52°C                  |
| Col2a1      | 5-GGA GAA GAA GCA<br>CAT CTG GTT TGG-3' | 5'-TGG ACG TTA<br>GCG GTG TTG GG-3'       | 96                 | 57°C                  |
| Col10a1     | 5'-GCG CGA TCA TGG<br>AGC TCA CGG-3'    | 5'-TTC ATA TGG<br>GAG CCA CTA GG-3'       | 129                | 55°C                  |
| Col1a2      | 5'-GCC ATC TCG CCT<br>GCC ATT CC-3'     | 5'-AAC AGA CAG<br>GGC CAA CCT CC-3'       | 89                 | 55°C                  |
| Osteopontin | 5'- CAG TCA GGC GCG<br>TTC CAA AGC-3'   | 5' GAA ATG CGG<br>AAT TTC AGA TAC<br>C-3' | 123                | 52°C                  |
| Osteocalcin | 5'- CGG CGC TAC CTC<br>AAC AAT GG-3'    | 5'- CGC TAG CTC<br>GTC ACA ATT GG-3'      | 105                | 52°C                  |
